# Supplementary material for: Quantitative Relaxometry Metrics for Brain Metastases Compared to Normal Tissues: A Pilot MR Fingerprinting Study
Source: MDPI journal article supplement (doi:10.3390/cancers14225606), 2022-11-15
Supplement: s1 [file s1]

**Supplementary Table S1:** T1 and T2 values from normal-appearing tissue and brain metastases

| Tissue              | T1 (ms)        |                      |                            | T2 (ms)       |                      |                      |
|---------------------|----------------|----------------------|----------------------------|---------------|----------------------|----------------------|
|                     | Mean $\pm$ SD  | Median<br>[min, max] | CI (95%)<br>[Upper, Lower] | Mean $\pm$ SD | Median<br>[min, max] | CI<br>[Upper, Lower] |
| <b>WM</b>           | 840 $\pm$ 42   | 842<br>[742, 919]    | [864, 817]                 | 78 $\pm$ 4    | 77<br>[73, 85]       | [80, 75]             |
| <b>GM</b>           | 1205 $\pm$ 31  | 1204<br>[1155, 1266] | [1223, 1188]               | 108 $\pm$ 11  | 107<br>[96, 132]     | [114-103]            |
| <b>CSF</b>          | 4233 $\pm$ 406 | 4190<br>[3610, 4990] | [4458, 4009]               | 442 $\pm$ 56  | 459<br>[355, 500]    | [473, 411]           |
| <b>BM-Untreated</b> | 2035 $\pm$ 278 | 1957<br>[1792, 2435] | [2478, 1593]               | 168 $\pm$ 47  | 169<br>[110, 223]    | [243, 92]            |
| <b>BM-Treated</b>   | 2163 $\pm$ 258 | 2202<br>[1629, 2558] | [2296, 2030]               | 141 $\pm$ 40  | 136<br>[96, 226]     | [161, 120]           |

**Supplementary Table S2:** Comparison of our MRF estimated T1 and T2 values from normal-appearing tissue and brain metastases with the published study.

| Tissue              | Metric  | Current Study | MAGiC [59] | MRF [26] | MRF [32] | MRF [30]   | MRF [36] | Other [24, 61–63] |
|---------------------|---------|---------------|------------|----------|----------|------------|----------|-------------------|
| <b>WM</b>           | T1 (ms) | 840±42        | 701±39     | 685±33   | 954±15.4 | ~800-1000  | 911±39   | 608-756           |
|                     | T2 (ms) | 78±4          | 64±4       | 65±4     | 39±1     | ~50-70     | 72±6     | 56-81             |
| <b>GM</b>           | T1 (ms) | 1205±31       | 1143±28    | 1180±104 | 1372±13  | ~1200-1350 | -        | 998-1304          |
|                     | T2 (ms) | 108±11        | 78±2       | 97±6     | 53±1     | ~60-120    | -        | 78-98             |
| <b>CSF</b>          | T1 (ms) | 4233±406      | 4206±226   | 4880±379 | 2330±70  | ~1800-2200 | -        | 4103-5400         |
|                     | T2 (ms) | 442±56        | 390±93     | 550±251  | 214±23   | ~-110-240  | -        | 1800-2460         |
| <b>Untreated BM</b> | T1 (ms) | 2035±278      | 1868±298   | -        | -        | -          | 1324±273 | -                 |
|                     | T2 (ms) | 167±47        | 100±17     | -        | -        | -          | 105±27   | -                 |
| <b>Treated BM</b>   | T1 (ms) | 2163±218      | 2211±269   | -        | -        | -          | -        | -                 |
|                     | T2 (ms) | 140±40        | 114±20     | -        | -        | -          | -        | -                 |
